# Supplementary material for: Acidic pH induced STM1485 gene is essential for intracellular replication of Salmonella
Source: PubMed Central journal article supplement — Virulence. 2012 Mar 1;3(2):122–35. doi: 10.4161/viru.19029 (PMC3396692; doi:10.4161/viru.19029), 2012-03-01
Supplement: viru-3-122-s01.pdf [file viru-3-122-s01.pdf]

**Figure S1.**

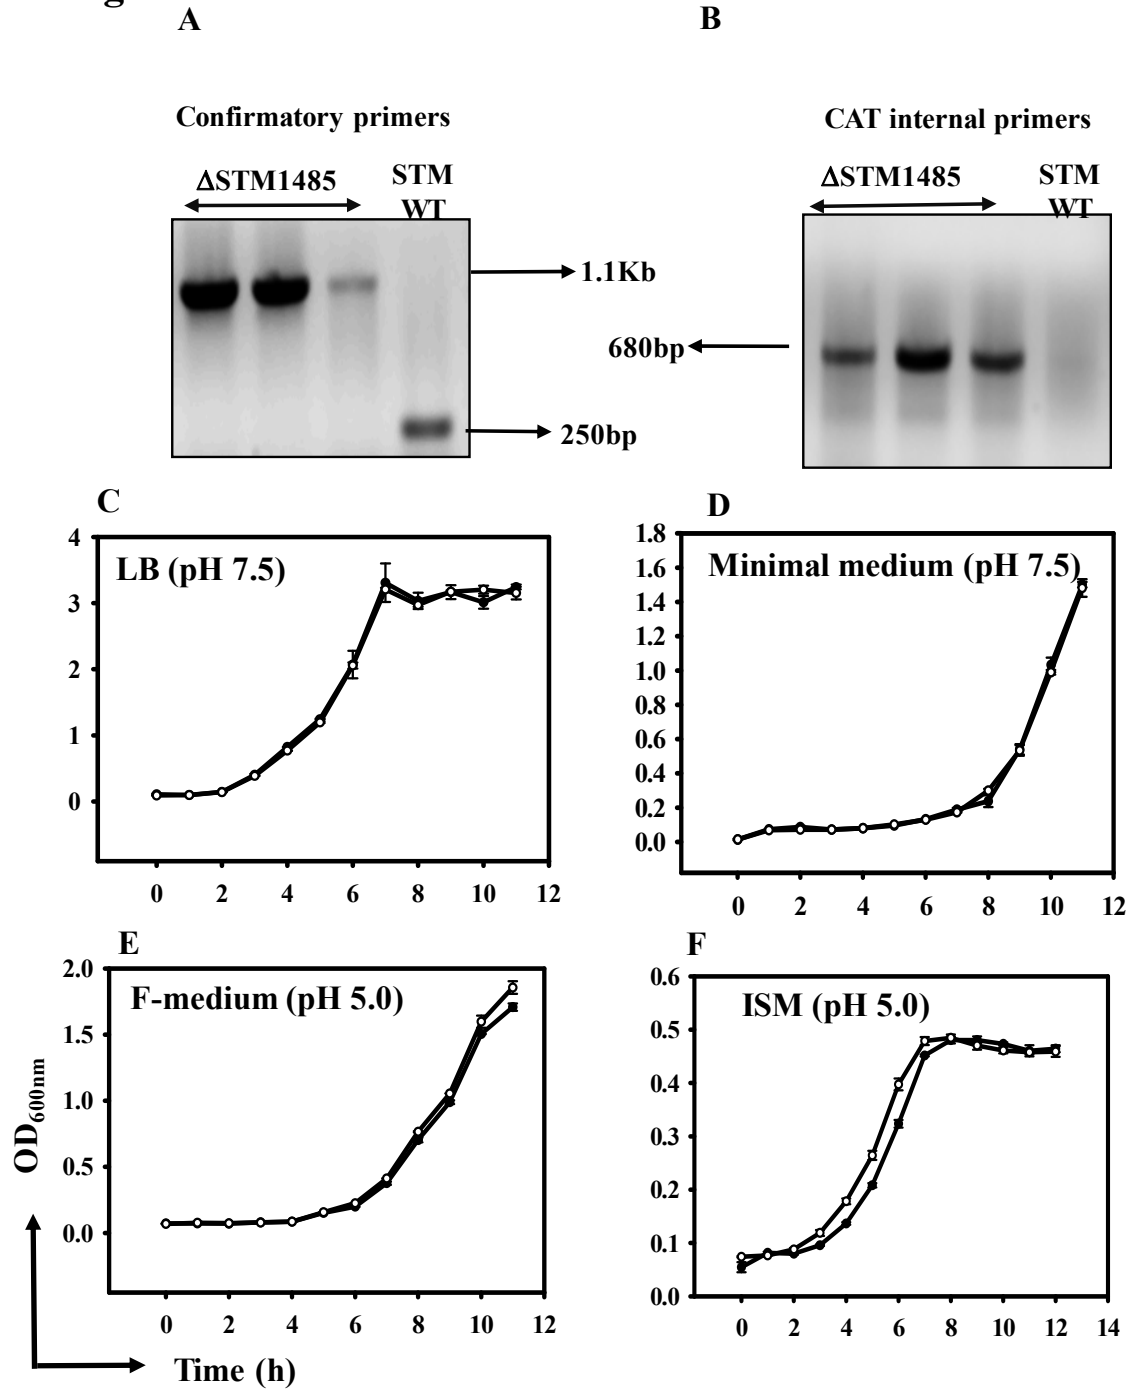

**Figure S1.**

**Generation of  $\Delta$ STM1485 strain and Growth kinetics in different media.**

$\Delta$ STM1485 strain was generated by one step deletion strategy, confirmed by confirmatory primers (A) and by CAT internal primers (B), Growth kinetics was done in LB at pH 7.5 (C), in minimal media at pH 7.5 (D), F-media at pH 5.0 (E) and ISM media at pH 5.0 (F). Growth was monitored as described in materials and methods. Data is representative of two independent experiments. Filled circles, WT; Open circles,  $\Delta$ STM1485. Bar indicates standard error.

**Table S1. Primers used in this study**

|                                        |                                                                                                                                           |
|----------------------------------------|-------------------------------------------------------------------------------------------------------------------------------------------|
| STM1485 deletion                       | For: 5'atgaaaaaagtattagctctggttggtgccgctgcaatggtgtaggctggagctgcttcg3'<br>Rev: 5'ttacgcagccggttgagtagtggtttgacgtggtttgcatatgaatacctcctta3' |
| STM1485 deletion confirmation          | For: 5'aacaaatcgagggtatc 3'<br>Rev: 5'gccgcagcatgttacgac 3'                                                                               |
| STM1485 cloning                        | For: 5'atgtggatccgaaaaaagtattagctctg 3'<br>Rev: 5'tgacaagcttttacgcagccggttgagt3'                                                          |
| <i>CAT</i> gene (pKD3) internal primer | 5'cagaccgttcagctggat3' (used as reverse primer)                                                                                           |
| 16S rRNA for RT-PCR                    | Forward: 5'gatcatggctcagattgaacgctggcgg3'<br>Reverse: 5'caccgctacacctggaattctacccccctc3'                                                  |
| STM1485:: 6xHis knock in               | Forward: 5'accaactactcaaccggctgcgcacatcaccatcaccactaacatatgaatacctccttag3'<br>Reverse: 5'atacagcaatggtttatgcatgtgtaggctggagctgcttc3'      |
| <i>spiC</i> RT-PCR                     | Forward: 5'atgtctgaggaggattcat3'<br>Reverse: 5'taccccacccgaataaagt3'                                                                      |
| <i>sseJ</i> cloning primers            | Forward: 5'agcgaattcgcacttagcaataatagtcg3'<br>Reverse: 5'gcg ggatccttagtgatgggtgatggtgttcagtggaataatgatgag3'                              |
| <i>Kan</i> gene (pKD4) internal primer | Forward: 5'cggtgccctgaatgaactgc3'                                                                                                         |
